# Supplementary material for: Low Frontal Alpha Power Is Associated With the Propensity for Burst Suppression: An Electroencephalogram Phenotype for a “Vulnerable Brain”
Source: PubMed Central journal article supplement — Anesth Analg. 2020 May 14;131(5):1529–39. doi: 10.1213/ANE.0000000000004781 (PMC7553194; doi:10.1213/ane.0000000000004781), 2020-05-14
Supplement: ane-131-1529-s001.pdf [file ane-131-1529-s001.pdf]

**Base Model**

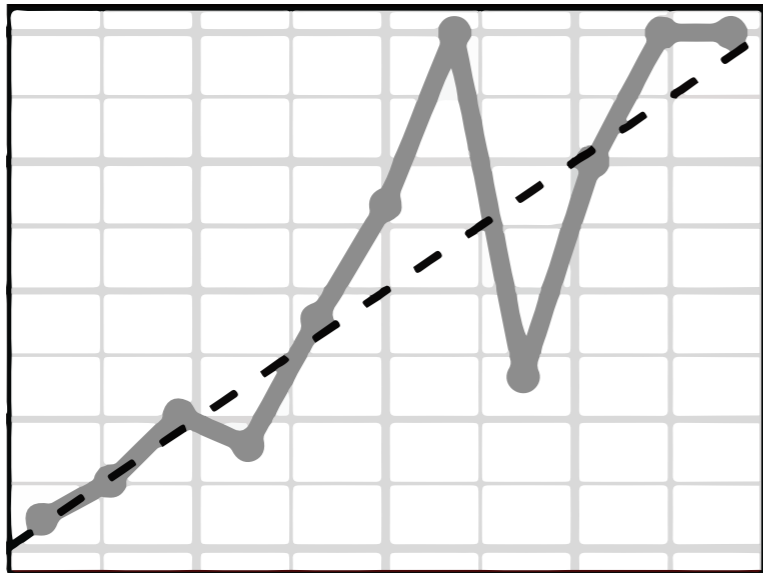

**Clinical Confounding Factors Model**

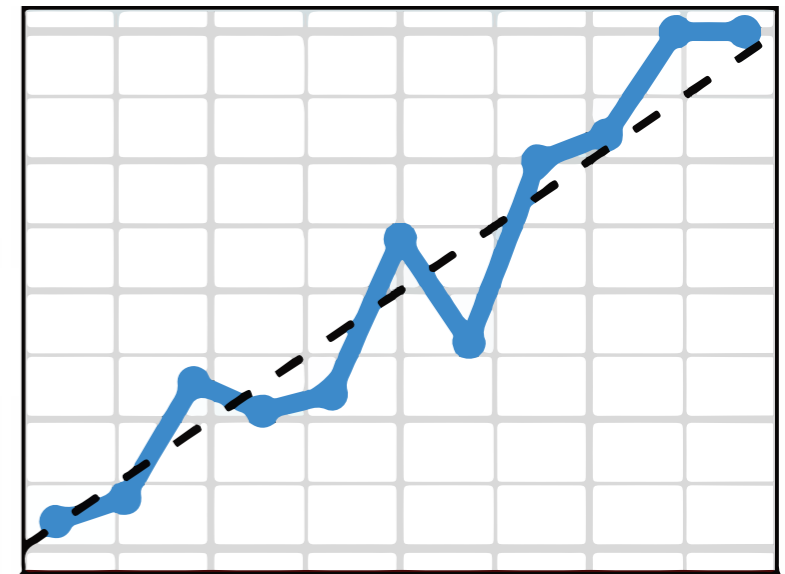

**Full Model**

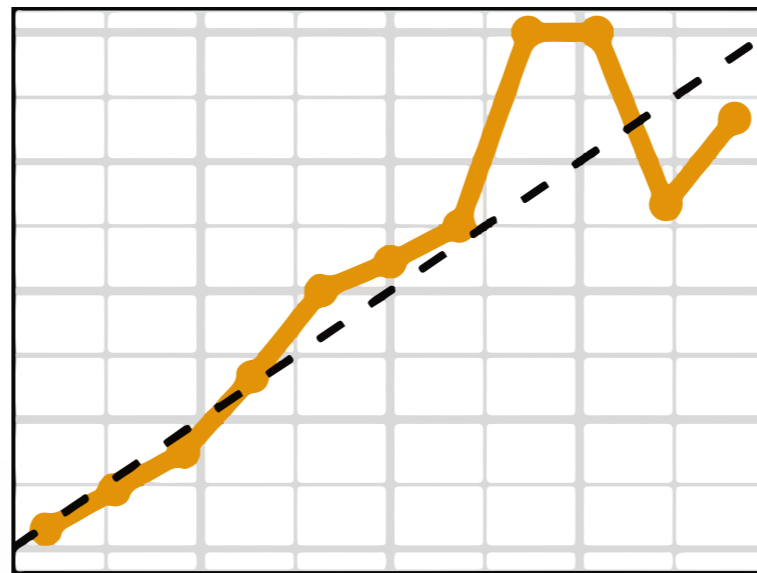

**Extended Mechanistic Model**

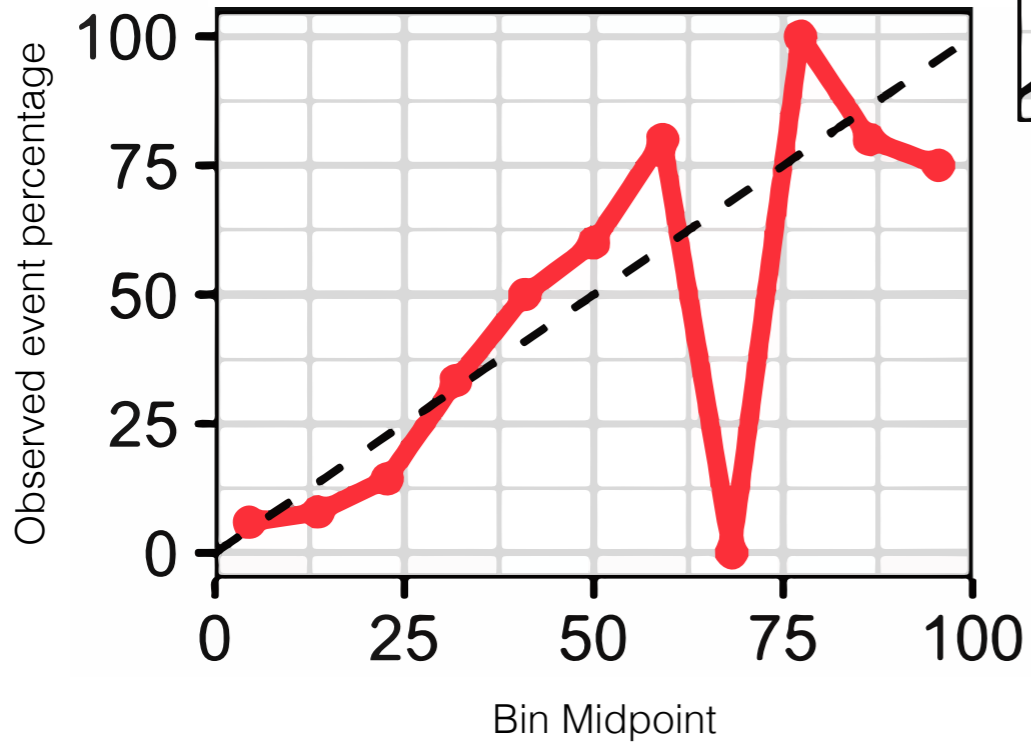

**Simplified Model**

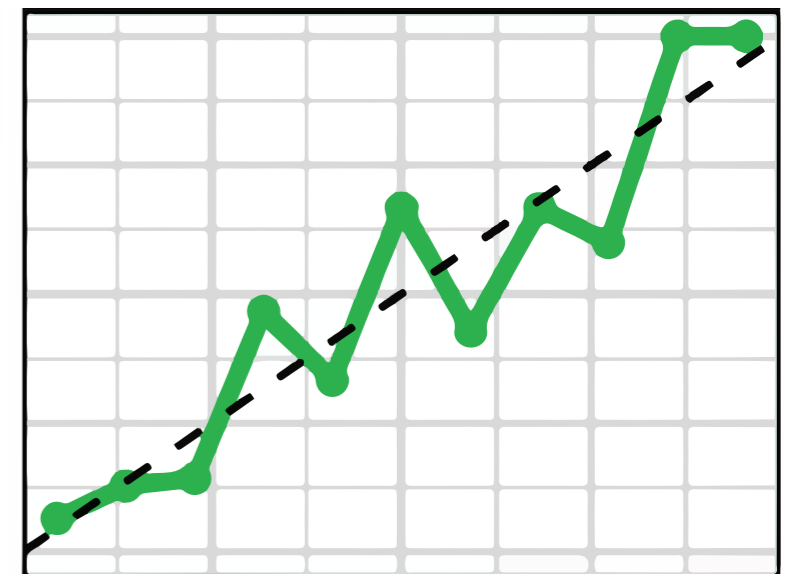

|                                           | Variable                            | Odds Ratio (95% CI)  | P-Value  | ROC-AUC (95% CI)        | AIC    | Hosmer-Lemeshow Test |
|-------------------------------------------|-------------------------------------|----------------------|----------|-------------------------|--------|----------------------|
| <b>Base Model</b>                         | Alpha power                         | 0.75<br>(0.67, 0.84) | <0.001 * | 0.801<br>(0.717, 0.884) | 139.76 | P-value: 0.5709      |
| <b>Extended Mechanistic Model</b>         | Alpha power                         | 0.80<br>(0.69, 0.92) | 0.0017 * | 0.845<br>(0.768, 0.922) | 137.83 | P-value: 0.06052     |
|                                           | Age                                 | 1.03<br>(0.99, 1.06) | 0.1646   |                         |        |                      |
|                                           | Anesthetic drug type                | 0.50<br>(0.20, 1.25) | 0.1375   |                         |        |                      |
|                                           | Anesthetic drug dose (standardized) | 0.76<br>(0.38, 1.53) | 0.4455   |                         |        |                      |
|                                           | Type * Dose                         | 1.83<br>(0.74, 4.53) | 0.1944   |                         |        |                      |
|                                           | Propofol bolus rate                 | 1.02<br>(1, 1.03)    | 0.0165 * |                         |        |                      |
| <b>Clinical Confounding Factors Model</b> | Alpha power                         | 0.75<br>(0.67, 0.85) | <0.001 * | 0.800<br>(0.717, 0.884) | 145.45 | P-value: 0.7112      |
|                                           | Sex                                 | 1.21<br>(0.51, 2.86) | 0.6645   |                         |        |                      |
|                                           | Intraop hypotension                 | 1.00<br>(1.00, 1.00) | 0.7417   |                         |        |                      |
|                                           | Pre/intraop midazolam               | 1.01<br>(0.67, 1.53) | 0.9468   |                         |        |                      |
| <b>Simplified Model</b>                   | Alpha power                         | 0.75<br>(0.67, 0.84) | <0.001 * | 0.821<br>(0.741, 0.902) | 135.56 | P-value: 0.762       |
|                                           | Propofol bolus rate                 | 1.01<br>(1.00, 1.03) | 0.0142 * |                         |        |                      |
| <b>Full Model</b>                         | Alpha power                         | 0.81<br>(0.70, 0.94) | 0.0051 * | 0.851<br>(0.777, 0.925) | 142.45 | P-value: 0.5161      |
|                                           | Age                                 | 1.03<br>(0.99, 1.07) | 0.1198   |                         |        |                      |
|                                           | Sex                                 | 1.69<br>(0.65, 4.39) | 0.2787   |                         |        |                      |
|                                           | Intraop hypotension                 | 1.00<br>(1.00, 1.00) | 0.8052   |                         |        |                      |
|                                           | Pre/intraop midazolam               | 1.10<br>(0.71, 1.71) | 0.6750   |                         |        |                      |
|                                           | Anesthetic drug type                | 0.45<br>(0.17, 1.15) | 0.0954   |                         |        |                      |
|                                           | Anesthetic drug dose (standardized) | 0.81<br>(0.39, 1.66) | 0.5581   |                         |        |                      |
|                                           | Type * Dose                         | 1.68<br>(0.65, 4.31) | 0.2806   |                         |        |                      |
|                                           | Propofol bolus rate                 | 1.02<br>(1.00, 1.03) | 0.0118 * |                         |        |                      |

### **Supplementary Table 1:**

The Base Model, the Extended Mechanistic Model, the Clinical Confounding Factors Model, the Simplified Model and the Full Model are logistic regression models consisting of different combinations of potential contributing factors associated with burst suppression. Alpha power and the rate of intraoperative propofol boluses are the only variables significantly associated with the probability of burst suppression across all models. Alpha power and propofol bolus rate remain significantly associated with the propensity for burst suppression in the Full Model which accounts for as much confounding as possible. The values for area under the Receiving Operating Characteristic curves (ROC-AUC) along with a 95% Confidence Interval (CI) and the Akaike Information Criterion (AIC) values appear comparable for the Base Model, the Extended Mechanistic Model, the Clinical Confounding Factors Model and the Simplified Model as well as the Full Model. The ROC-AUCs for the Extended Mechanistic Model and the Full Model are slightly larger than other three models, suggesting better model performance. The Simplified model had the lowest AIC value, suggesting that the added parameters in the other models are less helpful. The Hosmer-Lemeshow test results show that none of the models' predicted event rates deviate significantly from the observed events. Non-significant P value indicates non-significant deviation from good model calibration to the data.
